# Supplementary material
Source: Springer Nature journal article supplement (https://www.springermedizin.de/resource/supplementary/12967_2014_1869_MOESM6_ESM.pdf/9574962)

**A**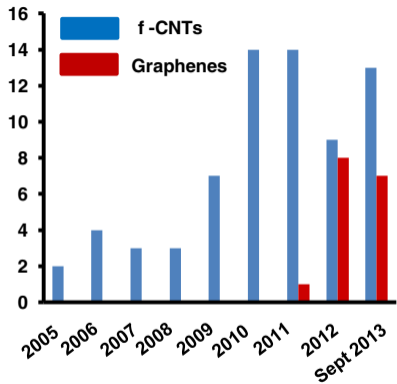**B**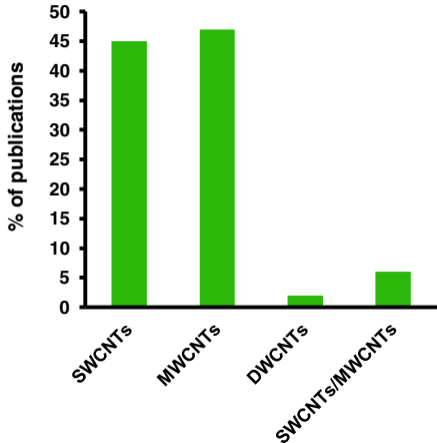

Supplement: MOESM6 [file 9574962]
